# Supplementary material for: The preparation of new covalent organic framework embedded with silver nanoparticles and its applications in degradation of organic pollutants from waste water
Source: Royal Society of Chemistry journal article supplement (doi:10.1039/c8dt04458a), 2018-12-18
Supplement: c8dt04458a1.pdf [file c8dt04458a1.pdf]

## Electronic Supplementary Information

### **The preparation of new Covalent Organic Framework (COF) embedded with silver nanoparticles and its applications in degradation of organic pollutants from waste water**

Rui-lei Wang<sup>a</sup>, Dong-peng Li<sup>a</sup>, Lu-jie Wang<sup>a</sup>, Xiao Zhang<sup>a</sup>, Zi-yan Zhou<sup>a,\*</sup>, Jing-lin Mu<sup>a,\*</sup>, Zhong-min Su<sup>b, c,\*</sup>

*<sup>a</sup>School of Chemistry and Chemical Engineering, Shandong University of Technology, Zibo 255049, P. R. China.*

*<sup>b</sup>School of Chemistry and Environmental Engineering, Changchun University of Science and Technology, Changchun 130024, P. R. China.*

*<sup>c</sup>College of Chemistry, Jilin University, Changchun 130012, P.R. China.*

\*Corresponding authors.

*E-mail addresses:* zyzhou@sdut.edu.cn (Ziyan Zhou); watfros@sdut.edu.cn (Jinglin Mu); zmsu@nenu.edu.cn (Zhongmin Su).

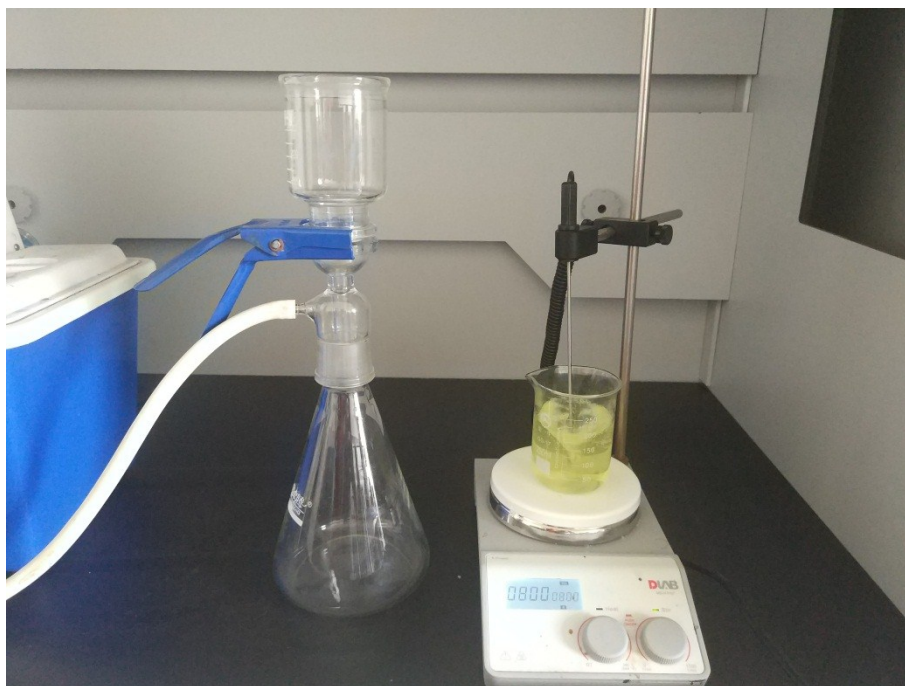

**Fig. S1** Digital photograph of the experimental device for the reduction of 4-NP polluted water.

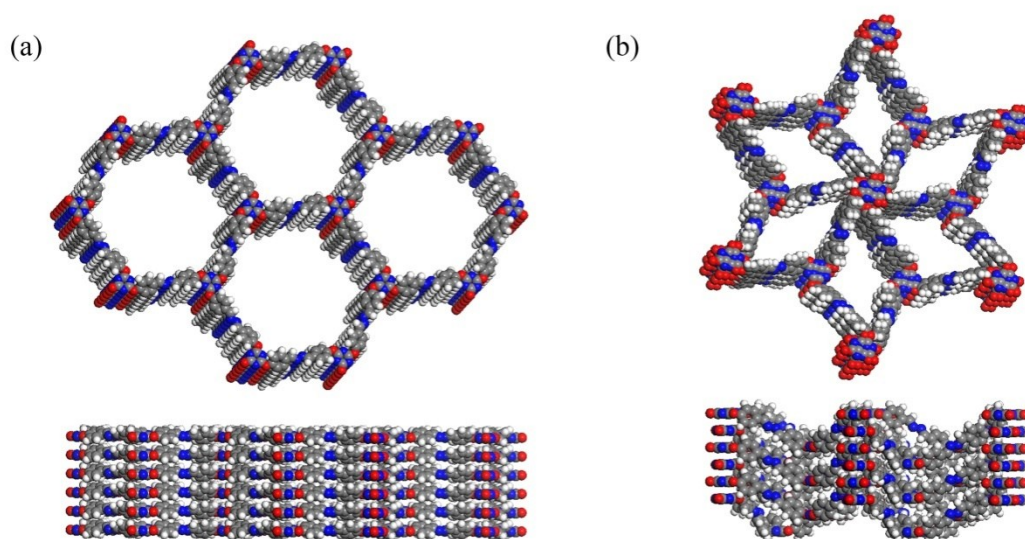

**Fig. S2** (a) AA stacking mode of TPHH-COF (top and side view); (b) AB stacking mode of TPHH-COF (top and side view).

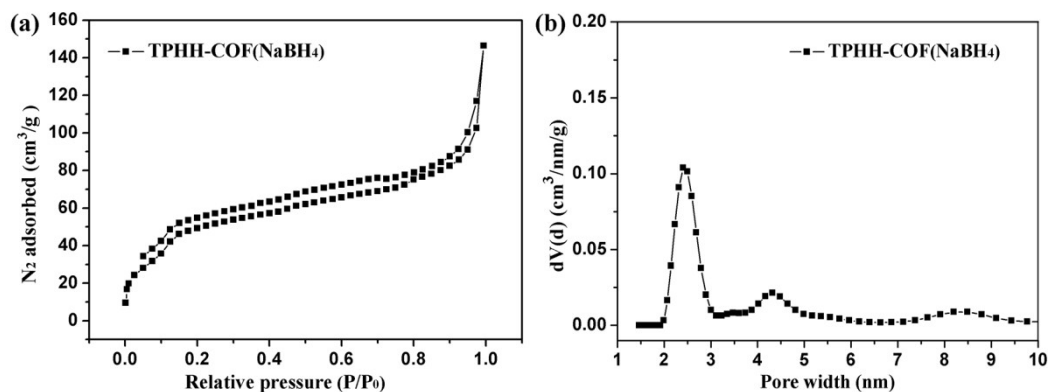

**Fig. S3** (a) N<sub>2</sub> adsorption isotherms of TPHH-COF treated with NaBH<sub>4</sub>; (b) The pore widths of TPHH-COF NaBH<sub>4</sub> centered at 2.4 nm.

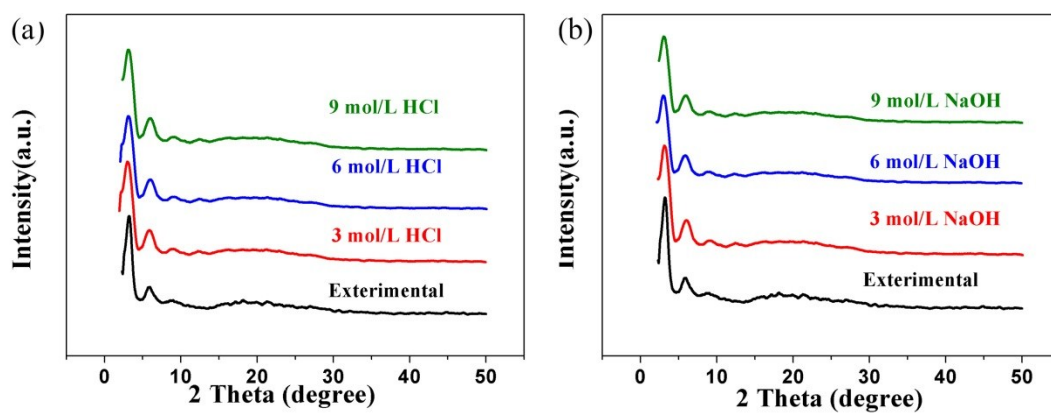

**Fig. S4** The PXRD patterns of TPHH-COF in different conditions: a series of HCl solutions (3 mol/L, 6 mol/L, 9 mol/L) and NaOH solutions (3 mol/L, 6 mol/L, 9 mol/L).

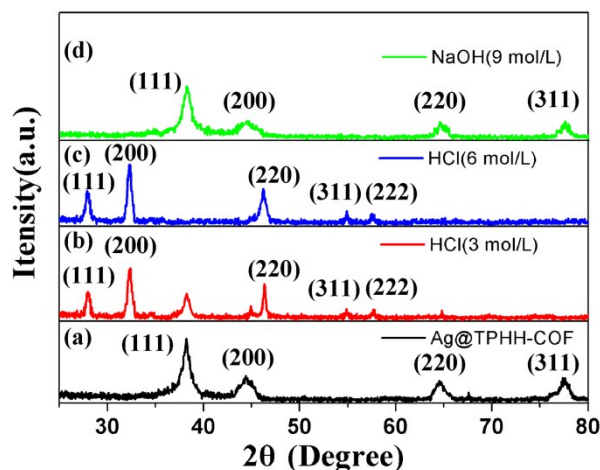

**Fig. S5** The PXRD patterns of Ag@TPHH-COF in different conditions ( $2\theta$  range:  $25^\circ$ - $80^\circ$ ) (a) Ag@TPHH-COF without any treatment. (b) Ag@TPHH-COF was immersed in HCl (aq., 3 mol/L) for 24 hours. (c) Ag@TPHH-COF was immersed in HCl (aq., 6 mol/L) for 24 hours. (d) Ag@TPHH-COF was immersed in NaOH (aq., 9 mol/L) for 24 h.

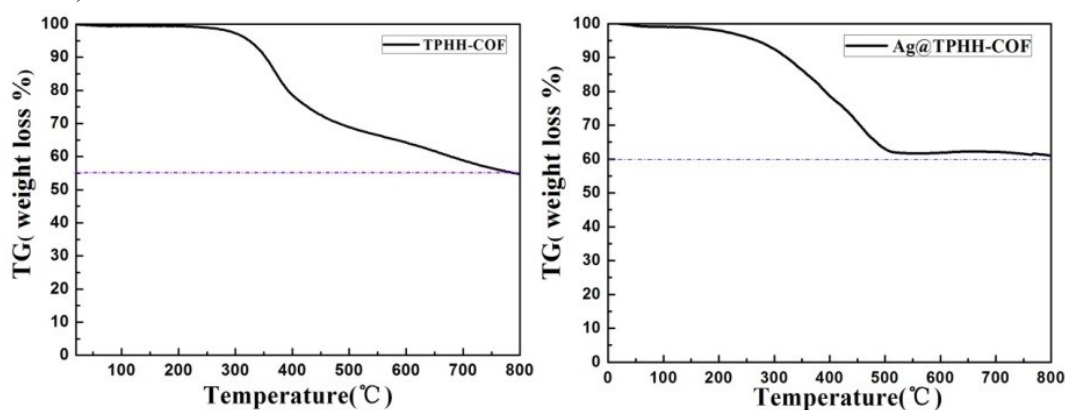

**Fig. S6** TGA graphs of TPHH-COF and Ag@TPHH-COF.

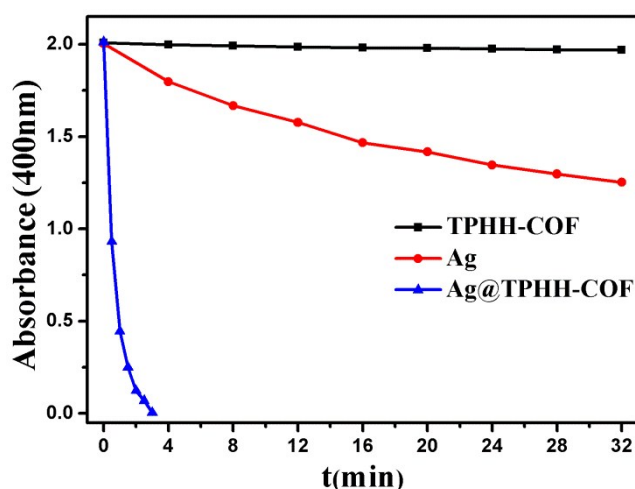

**Fig. S7** The time-dependent UV-vis absorption spectra of 4-NP solution (400 nm) in the presence of  $\text{NaBH}_4$  and TPHH-COF (4 mg), Ag (4 mg), Ag@TPHH-COF (4 mg) was used as catalyst, respectively.

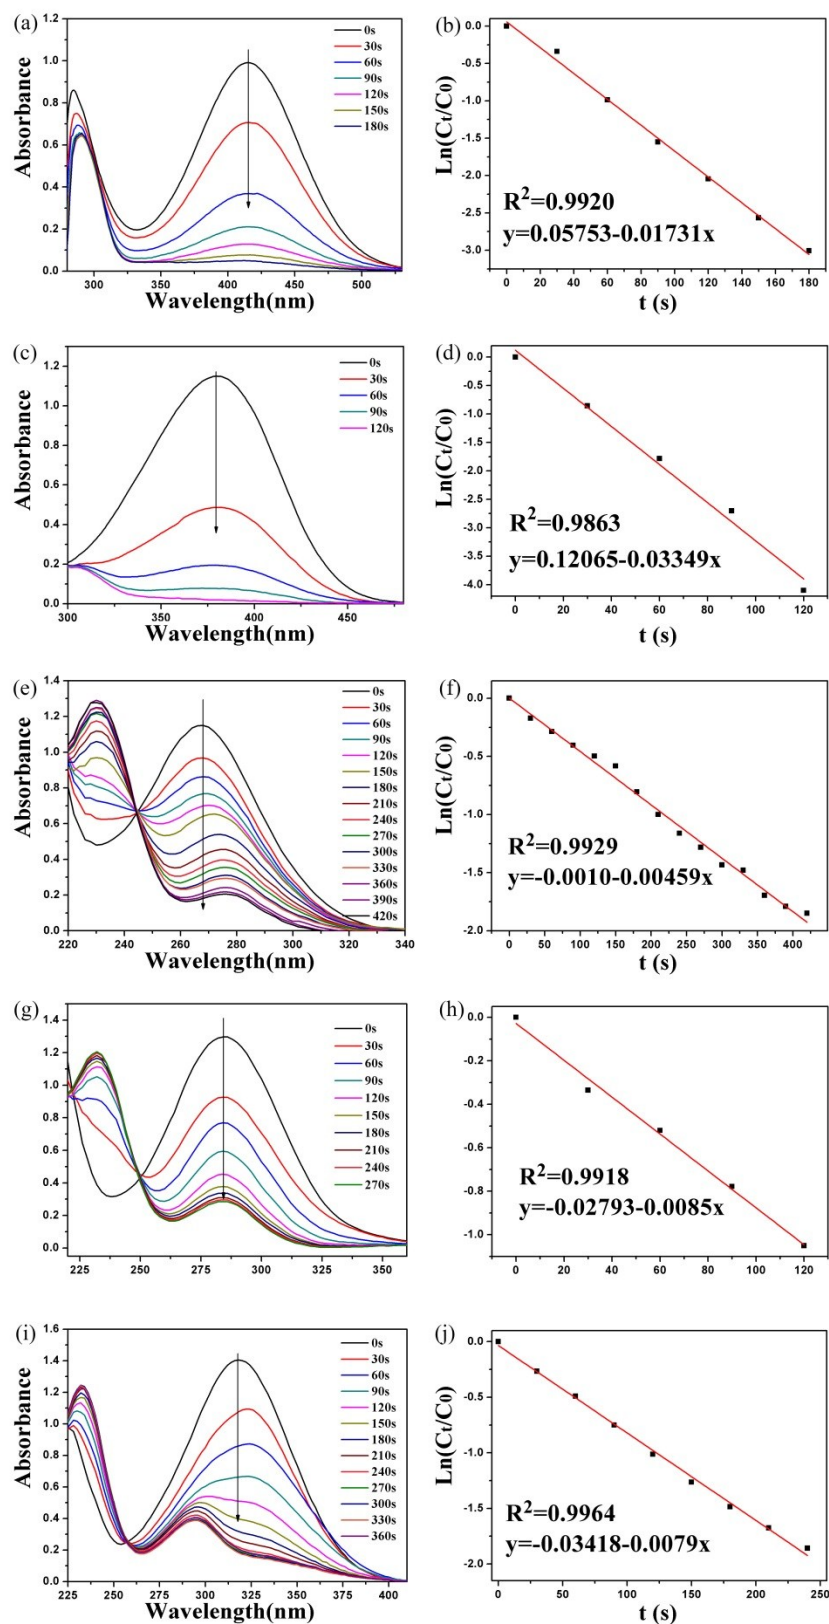

**Fig. S8** The UV-vis absorption spectra (left) and the plot of  $\ln(C_t/C_0)$  versus reaction time (right) for the reduction of NACs: (a, b) 2-nitrophenol, (c, d) 4-nitroaniline, (e, f) nitrobenzene, (g, h) 4-nitrotoluene, (i, j) 1-butyl-4-nitrobenzene.



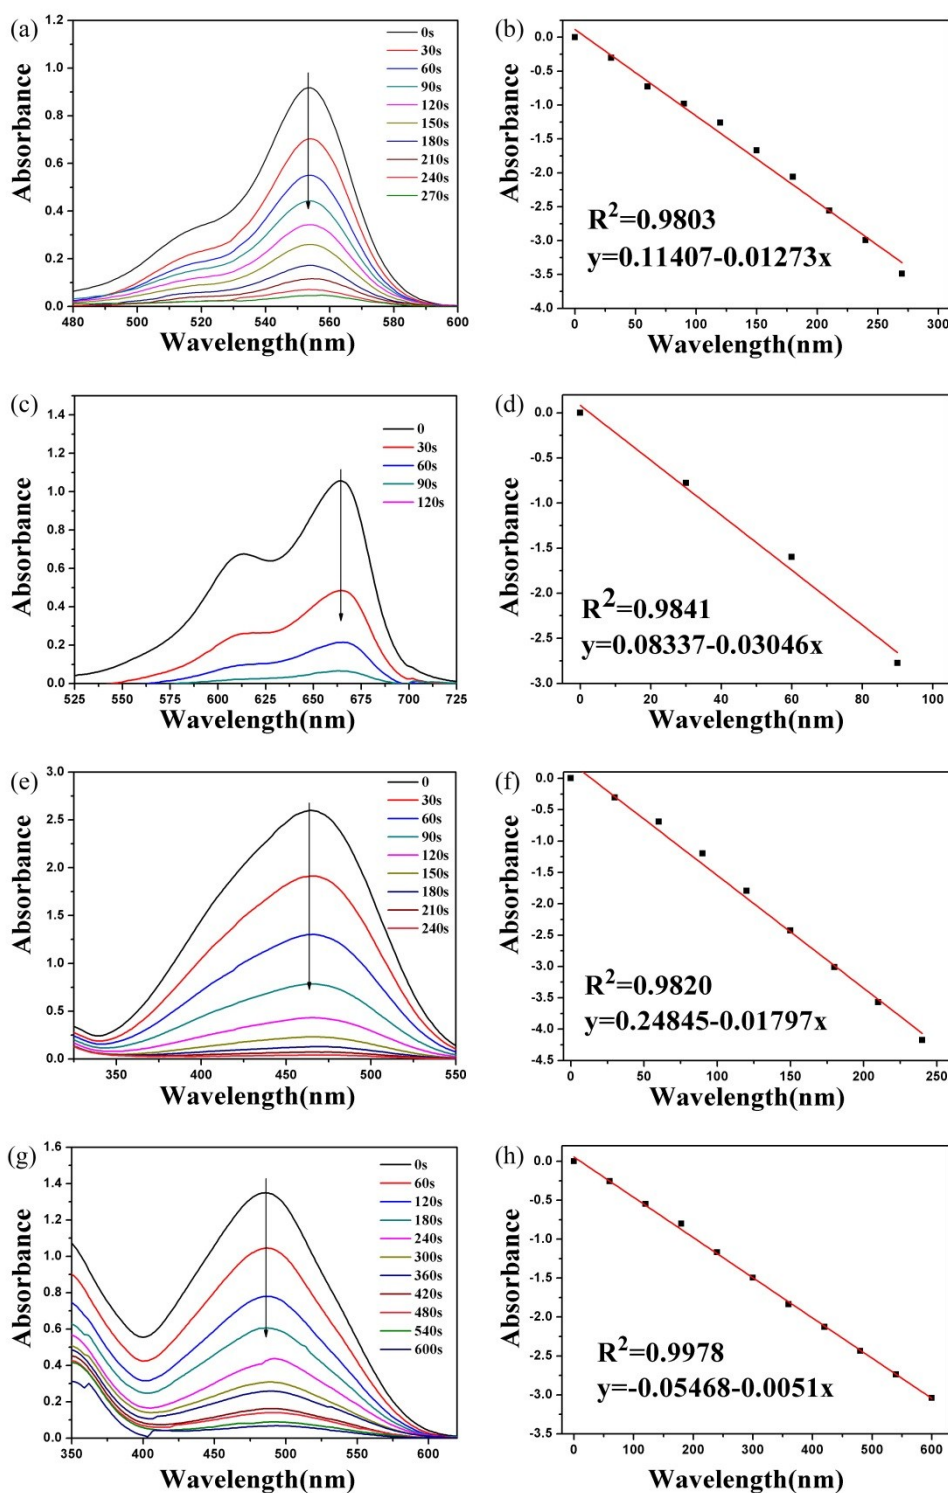

**Fig. S9** The UV-vis absorption spectra (left) and the plots of  $\ln(C_t/C_0)$  versus reaction time (right) for the reduction of dyes: (a, b) [RhB] =  $1 \times 10^{-5}$  mol/L, (c, d) [MB] =  $2 \times 10^{-5}$  mol/L, (e, f) [MO] =  $5 \times 10^{-5}$  mol/L, (g, h) [CR] =  $1 \times 10^{-4}$  mol/L.

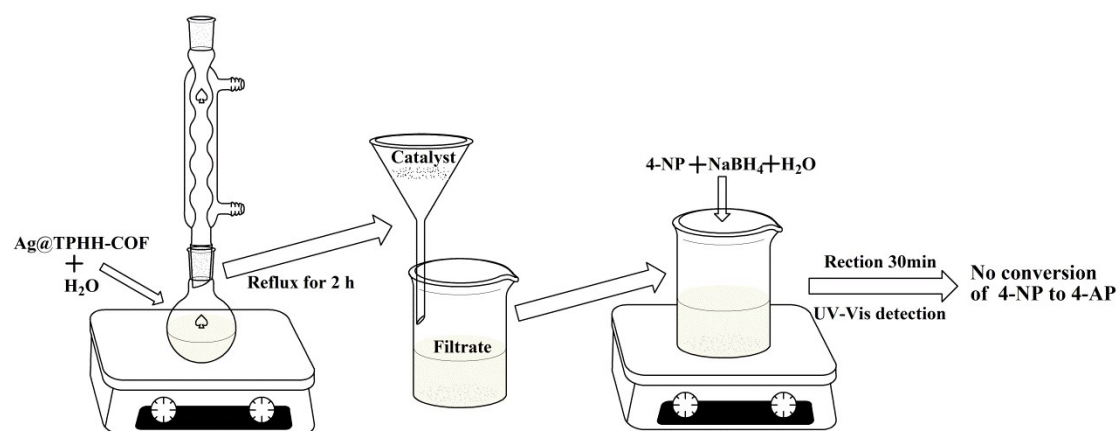

**Fig. S10** Typical catalyst leaching test performed for Ag@TPHH-COF catalyst: 50 mg of Ag@TPHH-COF catalyst and 4 ml  $\text{H}_2\text{O}$  was added into a round bottom flask. This catalyst was refluxed for 2 h and filtered in hot conditions into conical flask. To this catalyst free, filtrate solution required amount of the substrates (4-NP and  $\text{NaBH}_4$ ) was added and stirred at room temperature and reaction progress was traced using UV-Vis spectroscopy. The absence of the any trace of product after 30 min reaction confirmed the heterogeneous behavior of the catalyst.

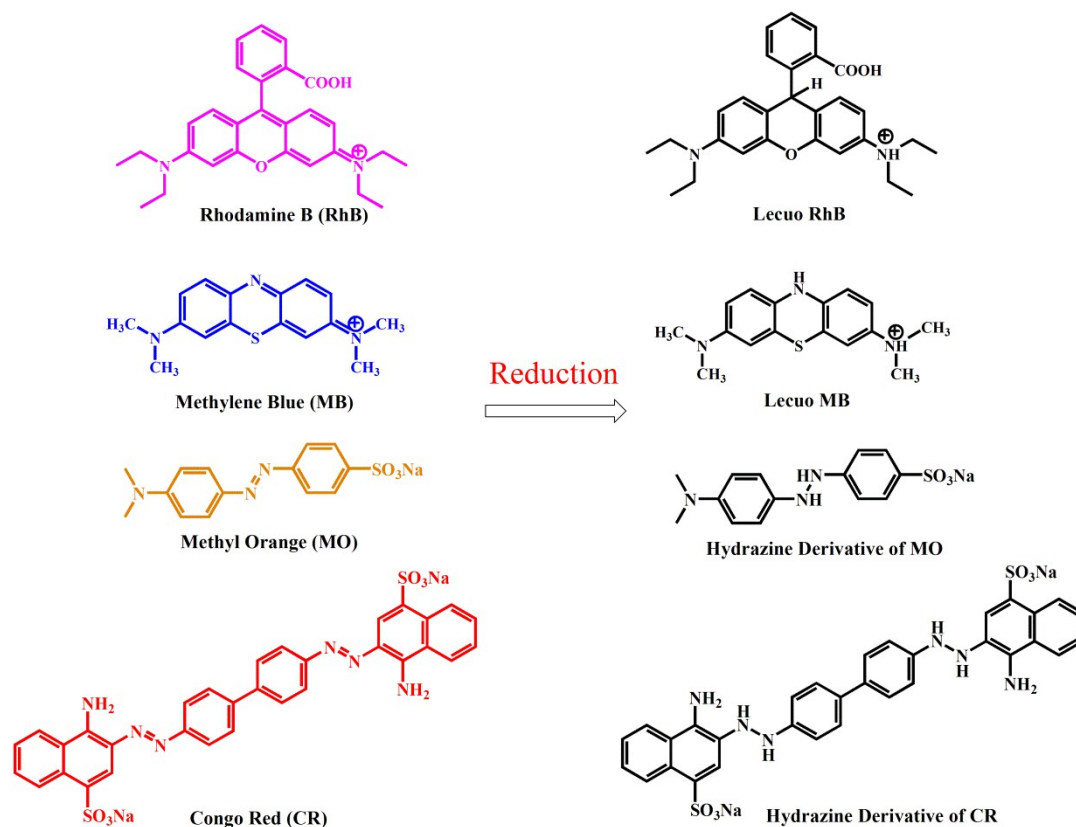

**Fig. S11** Reduction reactions of dyes to their leuco forms (hydrazine derivative for MO and CR).

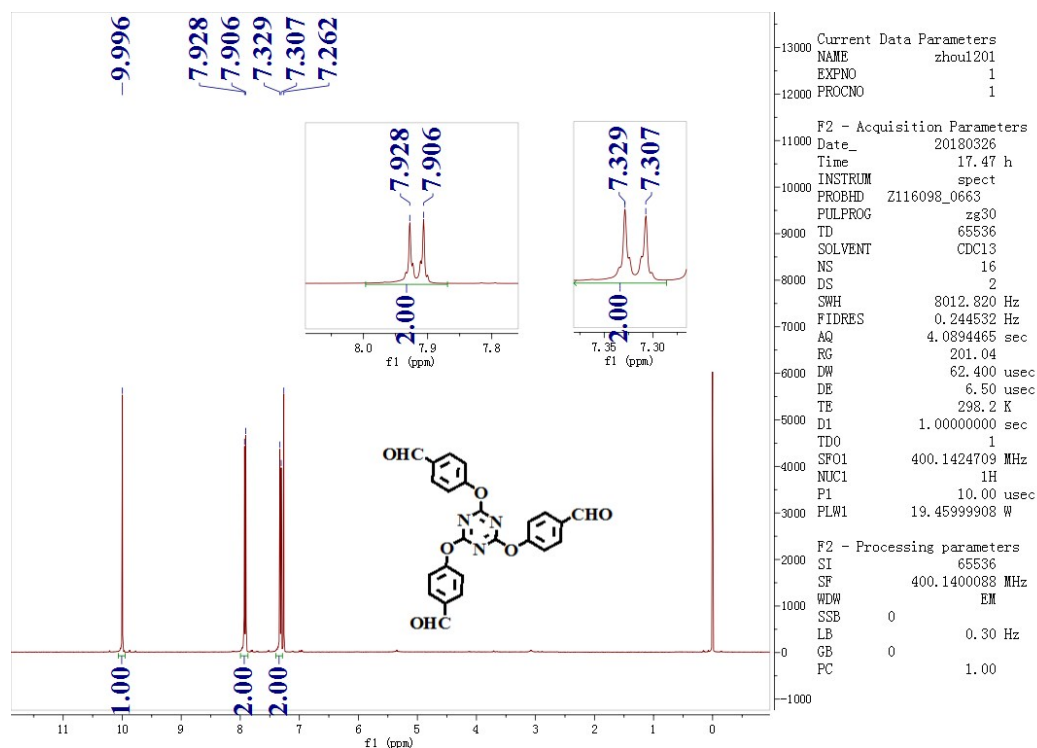

**Fig. S12**  $^1\text{H}$ NMR spectrum of TPT-CHO.



**Table S1** Fractional atomic coordinates for the unit cell of TPHH-COF calculated based on eclipsed AA model.

|                   |                                                                                                     |         |          |
|-------------------|-----------------------------------------------------------------------------------------------------|---------|----------|
| Space group       | P6                                                                                                  |         |          |
| Unit cell         | $a = b = 31.642 \text{ \AA}, c = 3.8967 \text{ \AA}, \alpha = \beta = 90^\circ, \gamma = 120^\circ$ |         |          |
| Pawley refinement | $R_p = 2.91\%, R_{wp} = 3.76\%$                                                                     |         |          |
| atom              | x                                                                                                   | y       | z        |
| C1                | 0.78982                                                                                             | 0.36025 | 0.04016  |
| C2                | 0.82807                                                                                             | 0.3561  | -0.10527 |
| C3                | 0.8761                                                                                              | 0.39301 | -0.07073 |
| C4                | 0.88819                                                                                             | 0.43586 | 0.11166  |
| C5                | 0.84967                                                                                             | 0.43919 | 0.26062  |
| C6                | 0.80154                                                                                             | 0.4022  | 0.23145  |
| C7                | 0.70312                                                                                             | 0.32842 | -0.01619 |
| C8                | 0.53806                                                                                             | 0.06364 | 0.15446  |
| O1                | 0.7413                                                                                              | 0.3203  | 0.00001  |
| N1                | 1.02357                                                                                             | 0.52232 | 0.04132  |
| N2                | 0.71099                                                                                             | 0.37335 | -0.01772 |
| H1                | 0.81767                                                                                             | 0.3222  | -0.25169 |
| H2                | 0.90458                                                                                             | 0.38799 | -0.19275 |
| H3                | 0.85753                                                                                             | 0.47181 | 0.41036  |
| H4                | 0.77338                                                                                             | 0.40665 | 0.36504  |
| H5                | 1.05628                                                                                             | 0.49171 | 0.30545  |

**Table S2** Fractional atomic coordinates for the unit cell of TPHH-COF calculated based on staggered AB model.

| Space group | P6 <sub>3</sub>                                                                                      |         |         |
|-------------|------------------------------------------------------------------------------------------------------|---------|---------|
| Unit cell   | $a = b = 28.3805 \text{ \AA}, c = 6.0482 \text{ \AA}, \alpha = \beta = 90^\circ, \gamma = 120^\circ$ |         |         |
| atom        | x                                                                                                    | y       | z       |
| C1          | 1.03923                                                                                              | 0.88073 | 1.57785 |
| C2          | 0.28751                                                                                              | 0.62687 | 0.50228 |
| C3          | 0.17962                                                                                              | 0.78893 | 0.84828 |
| C4          | 0.22337                                                                                              | 0.78408 | 0.76545 |
| C5          | 0.71303                                                                                              | 0.8783  | 1.26517 |
| C6          | 0.76684                                                                                              | 0.91873 | 1.31437 |
| C7          | 0.80183                                                                                              | 0.9558  | 1.15571 |
| C8          | 0.78809                                                                                              | 0.92264 | 1.52721 |
| C9          | 0.21832                                                                                              | 0.75881 | 0.56051 |
| C10         | 0.8555                                                                                               | 0.99311 | 1.20411 |
| C11         | 0.87658                                                                                              | 0.99536 | 1.4148  |
| C12         | 0.27287                                                                                              | 0.8035  | 0.87877 |
| C13         | 0.96462                                                                                              | 1.01352 | 1.46089 |
| C14         | 0.25992                                                                                              | 0.75242 | 0.47312 |
| C15         | 0.31462                                                                                              | 0.79715 | 0.79337 |
| C16         | 0.30849                                                                                              | 0.7709  | 0.59074 |
| O1          | 0.23531                                                                                              | 0.58516 | 0.51323 |
| O2          | 0.9294                                                                                               | 1.03261 | 1.4598  |
| N1          | -0.29172                                                                                             | 0.32647 | 0.00377 |
| N2          | 0.19113                                                                                              | 0.36683 | 1.03781 |
| N3          | 0.68516                                                                                              | 0.87511 | 1.08849 |
| N4          | 0.96302                                                                                              | 1.0142  | 0.95987 |
| H1          | 0.18759                                                                                              | 0.54011 | 0.88525 |
| H2          | 0.22531                                                                                              | 0.36665 | 0.74439 |
| H3          | 0.68911                                                                                              | 0.8441  | 1.38842 |
| H4          | 0.78759                                                                                              | 0.9554  | 0.98674 |
| H5          | 0.76217                                                                                              | 0.89465 | 1.65763 |
| H6          | 0.88182                                                                                              | 1.02046 | 1.07318 |
| H7          | 0.85698                                                                                              | 0.96369 | 1.74619 |
| H8          | 0.1803                                                                                               | 0.74309 | 0.46581 |
| H9          | 0.27966                                                                                              | 0.8242  | 1.03886 |
| H10         | 0.25437                                                                                              | 0.73176 | 0.31328 |
